# Supplementary material
Source: PubMed Central journal article supplement (PMC5442611)
Supplement: IAI.00023-17_zii999092046s1.pdf [file IAI.00023-17_zii999092046s1.pdf]

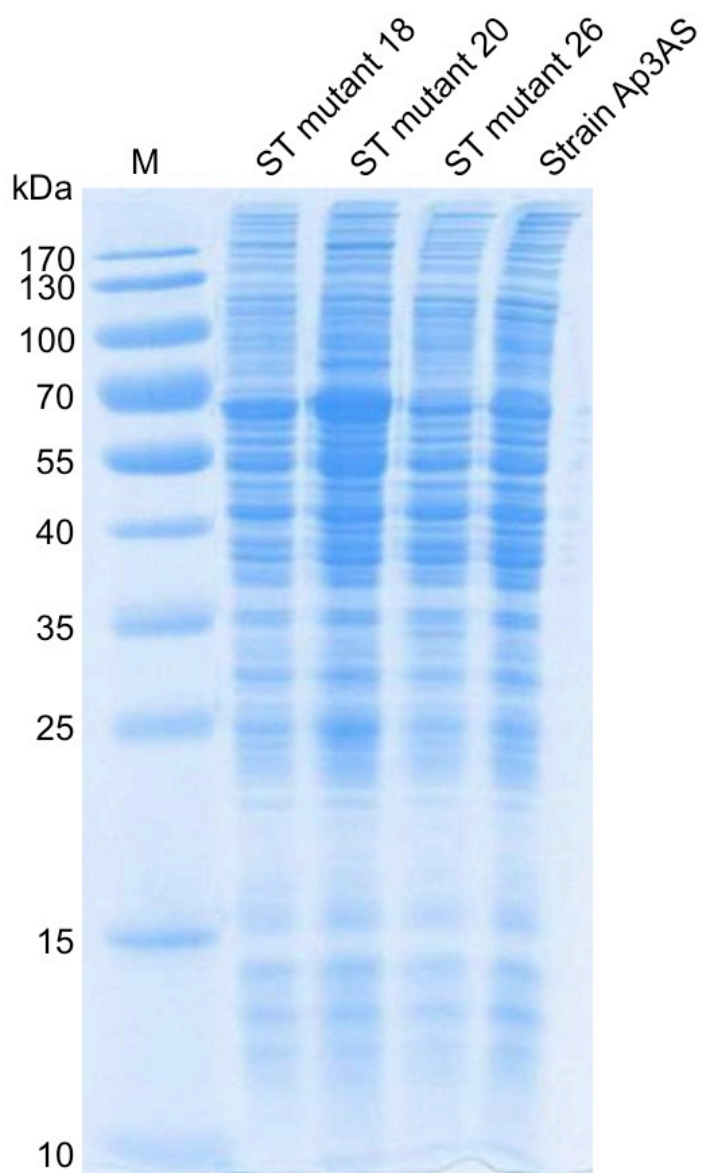

**Supplementary Figure 1** Coomassie blue stained gel run in duplicate with that used for Western blotting. Total cell proteins were separated in a 10% polyacrylamide gel together with molecular mass standards and then stained with Coomassie brilliant blue to ensure similar quantities of proteins were loaded into each lane for Western blot analysis. M: positions of broad range protein markers (PageRuler Prestained Protein Ladder, Thermo Scientific).
